# Supplementary material for: Is HbA1c an ideal biomarker of well-controlled diabetes?
Source: PubMed Central journal article supplement (PMC10016911; doi:10.1136/postgradmedj-2020-138756), 2020-09-10
Supplement: postgradmedj-97-380-dc1-inline-supplementary-material-1.pdf [file postgradmedj-97-380-dc1-inline-supplementary-material-1.pdf]

Table 1. Conditions associated with limitations in HbA1c measurement interpretation

| False relative increase                                                                         | False relative decrease                                                                                              |
|-------------------------------------------------------------------------------------------------|----------------------------------------------------------------------------------------------------------------------|
| Iron deficiency anemia<br>B12 or folic acid deficiency anemia                                   | Anemia due to blood loss<br>Hemolytic anemia                                                                         |
| Functional asplenia                                                                             | Splenomegaly                                                                                                         |
| Chronic Kidney Disease                                                                          | Pregnancy                                                                                                            |
| Severe metabolic abnormalities (<br>(triglycerides >1750 mg/dl or<br>bilirubin>20mg/dl)         | Vitamin E intake                                                                                                     |
| Chronic alcohol intake                                                                          | Use of ribavirin, interferon A,<br>cephalosporins, levofloxacin, penicillins,<br>anti-inflammatory drugs and quinine |
| Chronic ingestion of salicylates and<br>opioids                                                 |                                                                                                                      |
| Lead poisoning                                                                                  |                                                                                                                      |
| Variable effect in the case of hemoglobinopathies, vitamin C ingestion and blood<br>transfusion |                                                                                                                      |
